# Supplementary material for: The prognostic value of COL3A1/FBN1/COL5A2/SPARC-mir-29a-3p-H19 associated ceRNA network in Gastric Cancer through bioinformatic exploration
Source: PubMed Central journal article supplement (PMC7378928; doi:10.7150/jca.45378), 2020-06-16
Supplement: jcav11p4933s1.pdf [file jcav11p4933s1.pdf]

**Table S1. The commonly up-regulated genes in four GSE datasets.**

---

| <b>Up-regulated genes</b> |
|---------------------------|
| COL4A2                    |
| CMTM3                     |
| PDPN                      |
| PLXDC2                    |
| IGFBP7                    |
| TEAD4                     |
| FGD6                      |
| PRRX1                     |
| TGM2                      |
| FBN1                      |
| PLAU                      |
| S100A10                   |
| APOE                      |
| COL3A1                    |

---

---

DTL

BMP1

FLNA

CEBPB

LEF1

AFAP1L1

EDNRA

CDH11

GNB4

LGALS1

FZD2

GPR161

MSR1

AMIGO2

VCAN

HOXB7

---

---

SULF2

BAG2

LRP8

BUB1

COL5A1

TMEM158

RAB31

COL1A2

GREM1

NRP2

EHD2

ANTXR1

FAM83D

COL12A1

SPARC

CAP2

---

---

CST4

FN1

PMEPA1

PLPPR4

GPNMB

APOC1

FAM19A5

ADAM12

CLEC11A

OLFML2B

INHBA

RIN3

COL5A2

PDLIM7

SPHK1

SRPX2

---

---

THY1

COL6A3

RARRES1

CST2

TIMP1

COL8A1

MMP11

LY6E

MFAP2

COL1A1

NID2

CPXM1

SERPINH1

WISP1

BGN

HOXA10

---

---

CXCL8

DUXAP10

HOXC10

SPOCK1

ASPN

CRISPLD1

FKBP10

CLDN1

CTHRC1

ADAMTS2

CDH3

IGF2BP3

CEMIP

SPP1

SFRP4

SULF1

---

---

NOX4

CST1

THBS2

FAP

FNDC1

COL10A1

COL11A1

---

**Table S2. The commonly down-regulated genes in four GSE datasets.**

---

**Down-regulated genes**

---

GKN2

GKN1

ATP4A

ATP4B

AQP4

GIF

---

---

LIPF

KCNJ16

DPCR1

SOSTDC1

KCNE2

TRIM50

SCNN1G

CWH43

ESRRG

PGC

SLC28A2

PSAPL1

KRT20

VSIG1

LTF

CXCL17

---

---

AKR1B10

ALDOB

LOC643201

GSTA1

ADH7

CLIC6

CCKBR

CAPN9

MAL

SLC26A9

HRASLS2

MFSD4A

MUC5AC

FBP2

CHGA

CPA2

---

---

ALDH3A1

ADGRG2

VSTM2A

LINC00982

CAPN13

KIAA1324

CA9

TPCN2

PIK3C2G

SULT2A1

RDH12

SLC26A7

SSTR1

VSIG2

GATA6-AS1

HPGD

---

---

UPK1B

KCNJ15

ASCL1

DNER

SULT1C2

LINC00675

LINC01105

KAZALD1

SPINK2

TMED6

UGT2B15

ZBTB7C

SCNN1B

HAPLN1

AKR1C1

LYPD6B

---

---

ADTRP

IGH

CA2

RFX6

ACER2

CYP2C9

B3GNT6

PCAT18

GUCA2B

PKIB

SH3RF2

HHIP

AADAC

CYP2C18

RAB27B

MGAM

---

---

SPINK7

CNTN3

LINC01133

SULT1B1

CAPN8

ABCA8

SMIM6

AMPD1

JCHAIN

PBLD

ATP13A4

SMIM5

LRRC31

FOLR1

ENPP6

RNASE1

---

---

PLLP

NRG4

B4GALNT3

CYP2C19

SMIM24

FBXL13

LRRC66

LIFR

MYRF

RASSF6

ADAM28

FA2H

GATA5

SCIN

SGK2

TPH1

---

---

APOBEC1

ADRB2

LDHD

ACKR4

AKR7A3

OASL

SMPD3

XK

KLHDC7A

CYP3A5

TRPA1

ANG

FAM20A

TMPRSS2

DDX60

LOC400043

---

---

SLC16A7

ALDH1A1

KLF4

TRIQQ

UBE2QL1

CYSTM1

SYTL2

METTL7A

GCNT2

EPN3

FER1L4

ITPKA

NKX2-3

FMO5

ASPA

PCBP1-AS1

---

---

MST1L

ARHGEF28

RAB27A

MAOA

KCNMB2

RPS6KA6

EPB41L4B

UBL3

NEDD4L

SELENBP1

SH3BGRL2

RBM47

PPID

NFE2L2

PPP1R36

PDGFD

---

---

GPRC5C

BCL2L14

SLC9A1

NTN4

CA4

THSD4

C1orf116

ALDH6A1

IQGAP2

TMEM171

HIPK2

WIPF3

MRAP2

DGKD

SLC41A2

KCNK10

---

---

TLR3

MYZAP

PXMP2

LOC202181

RNASE4

NOSTRIN

SCNN1A

CCL28

ELOVL6

NQO1

AKR1C3

SLC7A8

CYP3A43

DISP1

CD36

LOC101927391

---

---

TMEM116

DHRS7

ABCC5

PRDM16

OSBPL7

MAGI3

PELI2

TMEM220

PPFIBP2

MAGIX

GRAMD1C

RNF128

LOC101928881

TMEM92

TEX9

SPATA6

---

---

MAGI1

---

**Table S3. The miRNA-mRNA pairs predicted by miRTarBase database.**

| <b>miRNA</b>     | <b>mRNA</b> |
|------------------|-------------|
| hsa-miR-200c-3p  | FN1         |
| hsa-miR-200b-3p  | FN1         |
| hsa-miR-1-3p     | FN1         |
| hsa-let-7g-5p    | FN1         |
| hsa-miR-140-3p   | FN1         |
| hsa-miR-29c-3p   | COL3A1      |
| hsa-miR-29b-3p   | COL3A1      |
| hsa-miR-29a-3p   | COL3A1      |
| hsa-let-7b-5p    | COL3A1      |
| hsa-miR-767-5p   | COL3A1      |
| hsa-miR-29b-1-5p | COL3A1      |
| hsa-miR-29c-3p   | FBN1        |

---

---

|                  |        |
|------------------|--------|
| hsa-miR-29a-3p   | FBN1   |
| hsa-miR-29b-3p   | FBN1   |
| hsa-miR-767-5p   | FBN1   |
| hsa-miR-486-5p   | FBN1   |
| hsa-miR-29a-3p   | COL5A2 |
| hsa-miR-29b-3p   | COL5A2 |
| hsa-miR-29c-3p   | COL5A2 |
| hsa-miR-767-5p   | COL5A2 |
| hsa-miR-27b-3p   | THBS2  |
| hsa-miR-135b-5p  | THBS2  |
| hsa-miR-29b-1-5p | COL5A1 |
| hsa-miR-29c-3p   | SPARC  |
| hsa-miR-29a-3p   | SPARC  |
| hsa-miR-29b-3p   | SPARC  |
| hsa-miR-767-5p   | SPARC  |
| hsa-miR-211-5p   | SPARC  |

---

|                |       |
|----------------|-------|
| hsa-miR-433-5p | SPARC |
| hsa-miR-1289   | ATP4A |

**Table S4. The lncRNA-miRNA pairs predicted by miRNet database.**

| <b>miRNA</b>    | <b>lncRNA</b> |
|-----------------|---------------|
| hsa-mir-29a-3p  | AC005154.5    |
| hsa-mir-200b-3p | AC005154.5    |
| hsa-mir-200c-3p | AC005154.5    |
| hsa-mir-29a-3p  | AC005154.6    |
| hsa-mir-200b-3p | AC005154.6    |
| hsa-mir-200c-3p | AC005154.6    |
| hsa-mir-29a-3p  | AC007036.5    |
| hsa-mir-29a-3p  | AC012146.7    |
| hsa-mir-29a-3p  | AP000304.2    |
| hsa-mir-200b-3p | C11orf95      |
| hsa-mir-200c-3p | C11orf95      |

---

|                 |               |
|-----------------|---------------|
| hsa-mir-200b-3p | CTA-204B4.6   |
| hsa-mir-200c-3p | CTA-204B4.6   |
| hsa-mir-200b-3p | CTB-92J24.2   |
| hsa-mir-200c-3p | CTB-92J24.2   |
| hsa-mir-29a-3p  | CTD-2116N17.1 |
| hsa-mir-29a-3p  | CTD-2339L15.1 |
| hsa-mir-29a-3p  | CTD-2517M14.5 |
| hsa-mir-200b-3p | CTD-2630F21.1 |
| hsa-mir-200c-3p | CTD-2630F21.1 |
| hsa-mir-200b-3p | CTD-3099C6.9  |
| hsa-mir-200c-3p | CTD-3099C6.9  |
| hsa-mir-200b-3p | CTD-3185P2.1  |
| hsa-mir-200c-3p | CTD-3185P2.1  |
| hsa-mir-200b-3p | CWC15         |
| hsa-mir-200c-3p | CWC15         |
| hsa-mir-29a-3p  | EMG1          |

---

---

|                 |              |
|-----------------|--------------|
| hsa-mir-29a-3p  | GAS5         |
| hsa-mir-29a-3p  | GS1-124K5.11 |
| hsa-mir-29a-3p  | H19          |
| hsa-mir-29a-3p  | HCP5         |
| hsa-mir-29a-3p  | HOXA-AS3     |
| hsa-mir-29a-3p  | HOXA-AS4     |
| hsa-mir-29a-3p  | KCNQ1OT1     |
| hsa-mir-29a-3p  | LIFR-AS1     |
| hsa-mir-29a-3p  | LINC00338    |
| hsa-mir-29a-3p  | LINC00511    |
| hsa-mir-200b-3p | LINC00641    |
| hsa-mir-200c-3p | LINC00641    |
| hsa-mir-200b-3p | LINC00667    |
| hsa-mir-200c-3p | LINC00667    |
| hsa-mir-200b-3p | MALAT1       |
| hsa-mir-200c-3p | MALAT1       |

---

---

|                 |                |
|-----------------|----------------|
| hsa-mir-200b-3p | MAPKAPK5-AS1   |
| hsa-mir-200c-3p | MAPKAPK5-AS1   |
| hsa-mir-200b-3p | MATN1-AS1      |
| hsa-mir-200c-3p | MATN1-AS1      |
| hsa-mir-29a-3p  | MIAT           |
| hsa-mir-29a-3p  | MLLT4-AS1      |
| hsa-mir-29a-3p  | OIP5-AS1       |
| hsa-mir-200b-3p | OIP5-AS1       |
| hsa-mir-200c-3p | OIP5-AS1       |
| hsa-mir-200b-3p | PPP1R9B        |
| hsa-mir-200c-3p | PPP1R9B        |
| hsa-mir-200c-3p | RP11-1134I14.8 |
| hsa-mir-29a-3p  | RP11-145M9.4   |
| hsa-mir-200b-3p | RP11-145M9.4   |
| hsa-mir-200c-3p | RP11-145M9.4   |
| hsa-mir-200b-3p | RP11-18F14.2   |

---

---

|                 |               |
|-----------------|---------------|
| hsa-mir-200c-3p | RP11-18F14.2  |
| hsa-mir-200b-3p | RP11-214C8.5  |
| hsa-mir-200c-3p | RP11-214C8.5  |
| hsa-mir-29a-3p  | RP11-216F19.2 |
| hsa-mir-29a-3p  | RP11-220I1.1  |
| hsa-mir-29a-3p  | RP11-227G15.3 |
| hsa-mir-200b-3p | RP11-277L2.2  |
| hsa-mir-200c-3p | RP11-277L2.2  |
| hsa-mir-29a-3p  | RP11-280F2.2  |
| hsa-mir-29a-3p  | RP11-290F20.1 |
| hsa-mir-29a-3p  | RP11-303E16.8 |
| hsa-mir-200b-3p | RP11-305E6.4  |
| hsa-mir-200c-3p | RP11-305E6.4  |
| hsa-mir-29a-3p  | RP11-311C24.1 |
| hsa-mir-29a-3p  | RP11-347I19.3 |
| hsa-mir-200b-3p | RP11-361F15.2 |

---

---

|                 |               |
|-----------------|---------------|
| hsa-mir-200c-3p | RP11-361F15.2 |
| hsa-mir-29a-3p  | RP11-373L24.1 |
| hsa-mir-200b-3p | RP11-379K17.4 |
| hsa-mir-200c-3p | RP11-379K17.4 |
| hsa-mir-200b-3p | RP11-403I13.4 |
| hsa-mir-200c-3p | RP11-403I13.4 |
| hsa-mir-29a-3p  | RP11-429J17.2 |
| hsa-mir-200b-3p | RP11-429J17.7 |
| hsa-mir-200c-3p | RP11-429J17.7 |
| hsa-mir-29a-3p  | RP11-467L20.9 |
| hsa-mir-200b-3p | RP11-473I1.10 |
| hsa-mir-200c-3p | RP11-473I1.10 |
| hsa-mir-29a-3p  | RP11-480D4.3  |
| hsa-mir-29a-3p  | RP11-615I2.7  |
| hsa-mir-29a-3p  | RP11-618G20.1 |
| hsa-mir-200b-3p | RP11-690D19.3 |

---

---

|                 |               |
|-----------------|---------------|
| hsa-mir-200c-3p | RP11-690D19.3 |
| hsa-mir-29a-3p  | RP11-690G19.3 |
| hsa-mir-200b-3p | RP11-91G21.2  |
| hsa-mir-200c-3p | RP11-91G21.2  |
| hsa-mir-200b-3p | RP13-507I23.1 |
| hsa-mir-200c-3p | RP13-507I23.1 |
| hsa-mir-29a-3p  | RP4-665N4.8   |
| hsa-mir-200b-3p | RP4-773N10.5  |
| hsa-mir-200c-3p | RP4-773N10.5  |
| hsa-mir-200b-3p | RP5-1085F17.3 |
| hsa-mir-200c-3p | RP5-1085F17.3 |
| hsa-mir-29a-3p  | RP5-837J1.2   |
| hsa-mir-200b-3p | RP6-24A23.7   |
| hsa-mir-200c-3p | RP6-24A23.7   |
| hsa-mir-200b-3p | SCAMP1        |
| hsa-mir-200c-3p | SCAMP1        |

---

---

|                 |           |
|-----------------|-----------|
| hsa-mir-29a-3p  | SETD5-AS1 |
| hsa-mir-29a-3p  | SIK3-IT1  |
| hsa-mir-29a-3p  | SPPL2B    |
| hsa-mir-29a-3p  | TUG1      |
| hsa-mir-29a-3p  | U47924.19 |
| hsa-mir-200b-3p | UBXN8     |
| hsa-mir-200c-3p | UBXN8     |
| hsa-mir-29a-3p  | XIST      |
| hsa-mir-200b-3p | XIST      |
| hsa-mir-200c-3p | XIST      |
| hsa-mir-29a-3p  | ZNF518A   |
| hsa-mir-200b-3p | ZNF518A   |
| hsa-mir-200c-3p | ZNF518A   |
| hsa-mir-29a-3p  | ZNF761    |

---

**Table S5. Sequences of primers using for qPCR.**

| <b>ID</b>  | <b>Forward Primer (5'-3')</b> | <b>Reverse Primer (5'-3')</b> |
|------------|-------------------------------|-------------------------------|
| miR-29a-3p | GCGTAGCACCATCTGAAAT           | CAGTGC GTGTCGTGGAGT           |
| U6         | CGCAAGGATGACACG               | GAGCAGGCTGGAGAA               |
| H19        | CCCACAACATGAAAGAAATGGTGC      | CACCTTCGAGAGCCGATTCC          |
| COL5A2     | CCGGGTCTAGCTGGTGAAG           | TCTCCTCTAGGTCCTAACGGG         |
| COL3A1     | CGGCAATCCTGAACTTCCTG          | ATCAGCTTCAGGGCCTTCTT          |
| FBN1       | GAGGCTGGGAACGTGAAG            | AGTGCTGCTGTGATGCCG            |
| SPARC      | ATGACGACGGCACCTACAG           | TCGCGTTGGGGTAACTTTTCA         |
| GAPDH      | AATGGACAACCTGGTTCGTGGAC       | CCCTCCAGGGGATCTGTTTG          |

**Table S6. GO and KEGG functional enrichment analysis.**

| <b>ID</b>  | <b>Term</b>                          | <b>P Value</b> | <b>Count</b> | <b>Associated Genes</b>                                                                                                                                |
|------------|--------------------------------------|----------------|--------------|--------------------------------------------------------------------------------------------------------------------------------------------------------|
| GO:0043062 | extracellular structure organization | 4.1291E-28     | 34           | ADAM12, ADAMTS2, ANTXR1, APOC1, APOE, BGN, BMP1, COL10A1, COL11A1, COL12A1, COL1A1, COL1A2, COL3A1, COL4A2, COL5A1, COL5A2, COL6A3, COL8A1, FAP, FBN1, |

---

|            |                                       |            |    |                                                                                                                                                                                                                                           |
|------------|---------------------------------------|------------|----|-------------------------------------------------------------------------------------------------------------------------------------------------------------------------------------------------------------------------------------------|
|            |                                       |            |    | FN1, GREM1, MFAP2, MMP11, NID2, OLFML2B, PDPN, SERPINH1, SPARC, SPP1, SULF1, SULF2, TIMP1, VCAN                                                                                                                                           |
| GO:0030198 | extracellular matrix organization     | 4.6022E-28 | 32 | ADAM12, ADAMTS2, ANTXR1, BGN, BMP1, COL10A1, COL11A1, COL12A1, COL1A1, COL1A2, COL3A1, COL4A2, COL5A1, COL5A2, COL6A3, COL8A1, FAP, FBN1, FN1, GREM1, MFAP2, MMP11, NID2, OLFML2B, PDPN, SERPINH1, SPARC, SPP1, SULF1, SULF2, TIMP1, VCAN |
| GO:0030199 | collagen fibril organization          | 7.1746E-15 | 11 | ADAMTS2, COL11A1, COL12A1, COL1A1, COL1A2, COL3A1, COL5A1, COL5A2, GREM1, MMP11, SERPINH1                                                                                                                                                 |
| GO:0051216 | cartilage development                 | 1.201E-09  | 13 | BMP1, CDH11, COL11A1, COL12A1, COL1A1, COL6A3, GREM1, INHBA, PRRX1, SERPINH1, SULF1, SULF2, TIMP1                                                                                                                                         |
| GO:0061448 | connective tissue development         | 2.8661E-09 | 14 | BMP1, CDH11, COL11A1, COL12A1, COL1A1, COL5A1, COL6A3, GREM1, INHBA, PRRX1, SERPINH1, SULF1, SULF2, TIMP1                                                                                                                                 |
| GO:0010810 | regulation of cell-substrate adhesion | 3.0566E-08 | 12 | COL1A1, COL8A1, FLNA, FN1, GREM1, INHBA, LGALS1, PDPN, PLAU, S100A10, SPOCK1, THY1                                                                                                                                                        |
| GO:0060348 | bone development                      | 1.9105E-07 | 11 | CDH11, COL12A1, COL1A1, COL6A3, FBN1, GREM1, SERPINH1, SFRP4, SPARC, SULF1, SULF2                                                                                                                                                         |
| GO:0034308 | primary alcohol metabolic process     | 1.182E-07  | 10 | ADH7, AKR1B10, AKR1C1, AKR1C3, ALDH1A1, RAB27A, RDH12, SULT1B1, SULT1C2, SULT2A1                                                                                                                                                          |

---

|            |                                                          |            |    |                                                                                                 |
|------------|----------------------------------------------------------|------------|----|-------------------------------------------------------------------------------------------------|
| GO:0006805 | xenobiotic metabolic process                             | 2.1874E-07 | 12 | AADAC, AKR1C1, AKR7A3, ALDH3A1, CYP2C18, CYP2C19, CYP2C9, CYP3A5, GSTA1, NQO1, SULT1B1, UGT2B15 |
| GO:0001676 | long-chain fatty acid metabolic process                  | 1.3839E-06 | 10 | ADTRP, AKR1C1, AKR1C3, CYP2C18, CYP2C19, CYP2C9, ELOVL6, FA2H, GSTA1, HPGD                      |
| GO:0016614 | oxidoreductase activity, acting on CH-OH group of donors | 4.3311E-06 | 10 | ADH7, AKR1B10, AKR1C1, AKR1C3, AKR7A3, ALDH3A1, HPGD, LDHD, LIPF, RDH12                         |
| GO:0071466 | cellular response to xenobiotic stimulus                 | 1.011E-05  | 12 | AADAC, AKR1C1, AKR7A3, ALDH3A1, CYP2C18, CYP2C19, CYP2C9, CYP3A5, GSTA1, NQO1, SULT1B1, UGT2B15 |
| GO:0071805 | potassium ion transmembrane transport                    | 7.8303E-05 | 11 | ADRB2, ATP4A, ATP4B, KCNE2, KCNJ15, KCNJ16, KCNK10, KCNMB2, NEDD4L, SGK2, SLC9A1                |
| GO:0016999 | antibiotic metabolic process                             | 6.8357E-05 | 10 | ADH7, AKR1B10, AKR1C1, AKR1C3, ALDH1A1, LDHD, RNASE1, SULT1B1, SULT1C2, SULT2A1                 |
| GO:0044242 | cellular lipid catabolic process                         | 4.6583E-05 | 12 | AADAC, ACER2, ADTRP, AKR1B10, AKR1C1, AKR1C3, ENPP6, FA2H, GSTA1, RAB27A, SMPD3, ZBTB7C         |
| GO:0004497 | monooxygenase activity                                   | 4.3377E-05 | 10 | AKR1C1, AKR1C3, CYP2C18, CYP2C19, CYP2C9, CYP3A43, CYP3A5, FMO5, NOSTRIN, TPH1                  |
| GO:0015079 | potassium ion transmembrane transporter activity         | 4.2156E-05 | 11 | ADRB2, ATP4A, ATP4B, KCNE2, KCNJ15, KCNJ16, KCNK10, KCNMB2, NEDD4L, SGK2, SLC9A1                |
| KEGG:04974 | Protein digestion and absorption                         | 1.0474E-10 | 10 | COL10A1, COL11A1, COL12A1, COL1A1, COL1A2, COL3A1,                                              |

---

|            |                                                      |            |    |                                                                                   |
|------------|------------------------------------------------------|------------|----|-----------------------------------------------------------------------------------|
|            |                                                      |            |    | COL4A2, COL5A1, COL5A2, COL6A3                                                    |
| KEGG:05200 | Pathways in cancer                                   | 0.04064652 | 7  | COL4A2, CXCL8, EDNRA, FN1, FZD2, GNB4, LEF1                                       |
| KEGG:04151 | PI3K-Akt signaling pathway                           | 0.00121608 | 8  | COL1A1, COL1A2, COL4A2, COL6A3, FN1, GNB4, SPP1, THBS2                            |
| KEGG:04510 | Focal adhesion                                       | 2.3157E-05 | 8  | COL1A1, COL1A2, COL4A2, COL6A3, FLNA, FN1, SPP1, THBS2                            |
| KEGG:04512 | ECM-receptor interaction                             | 5.4102E-07 | 7  | COL1A1, COL1A2, COL4A2, COL6A3, FN1, SPP1, THBS2                                  |
| KEGG:04926 | Relaxin signaling pathway                            | 0.00111533 | 5  | COL1A1, COL1A2, COL3A1, COL4A2, GNB4                                              |
| KEGG:04933 | AGE-RAGE signaling pathway in diabetic complications | 2.098E-06  | 7  | COL1A1, COL1A2, COL3A1, COL4A2, CXCL8, FN1, NOX4                                  |
| KEGG:05146 | Amoebiasis                                           | 2.3082E-05 | 6  | COL1A1, COL1A2, COL3A1, COL4A2, CXCL8, FN1                                        |
| KEGG:05165 | Human papillomavirus infection                       | 0.00076979 | 8  | COL1A1, COL1A2, COL4A2, COL6A3, FN1, FZD2, SPP1, THBS2                            |
| KEGG:04971 | Gastric acid secretion                               | 4.939E-08  | 10 | ATP4A, ATP4B, CA2, CCKBR, KCNE2, KCNJ15, KCNJ16, KCNK10, SLC26A7, SLC9A1          |
| KEGG:05204 | Chemical carcinogenesis                              | 1.1793E-07 | 10 | ADH7, ALDH3A1, CYP2C18, CYP2C19, CYP2C9, CYP3A43, CYP3A5, GSTA1, SULT2A1, UGT2B15 |
| KEGG:00982 | Drug metabolism                                      | 4.2285E-07 | 9  | ADH7, ALDH3A1, CYP2C19, CYP2C9, CYP3A5, FMO5, GSTA1, MAOA, UGT2B15                |
| KEGG:00980 | Metabolism of xenobiotics by cytochrome P450         | 6.7706E-07 | 9  | ADH7, AKR1C1, AKR7A3, ALDH3A1, CYP2C9, CYP3A5, GSTA1, SULT2A1, UGT2B15            |

---

---

|            |                                           |            |   |                                                        |
|------------|-------------------------------------------|------------|---|--------------------------------------------------------|
| KEGG:00830 | Retinol metabolism                        | 2.8949E-05 | 7 | ADH7, ALDH1A1, CYP2C18, CYP2C9, CYP3A5, RDH12, UGT2B15 |
| KEGG:04960 | Aldosterone-regulated sodium reabsorption | 0.00144629 | 4 | NEDD4L, SCNN1A, SCNN1B, SCNN1G                         |
| KEGG:00910 | Nitrogen metabolism                       | 0.00139889 | 3 | CA2, CA4, CA9                                          |
| KEGG:00340 | Histidine metabolism                      | 0.00343639 | 3 | ALDH3A1, ASPA, MAOA                                    |

---
